# Supplementary material for: Application of quaternary Cu2ZnSnS4 quantum dot-sensitized solar cells based on the hydrolysis approach
Source: Royal Society of Chemistry journal article supplement (doi:10.1039/c5gc01049g), 2015-01-01
Supplement: c5gc01049g1.pdf [file c5gc01049g1.pdf]

## Electronic Supplementary Information

### Application of quaternary $\text{Cu}_2\text{ZnSnS}_4$ quantum dot-sensitized Solar Cells based on hydrolysis approach

Bing Bai, Dongxing Kou\*, Wenhui Zhou, Zhengji Zhou and Sixin Wu\*

*The Key Laboratory fo Special Functional Materials of MOE, Henan University, Kaifeng, 475004, P. R. China*

\*E-mail: koudongxing@henu.edu.cn and wusixin@henu.edu.cn

**Talbe S1.** Elemental composition values of CZTS QDs synthesized by changing the reaction times according to the EDX measurement

|       | 90s        | 3min       | 6min       | 12min      | 24min      | 45min      |
|-------|------------|------------|------------|------------|------------|------------|
| Cu/Zn | 56.32/4.8  | 42.23/6.75 | 29.79/10.6 | 26.15/13.0 | 25.98/12.4 | 25.07/11.7 |
| /Sn/S | 7/9.25/29. | /12.69/38. | 5/14.43/45 | 9/14.25/46 | 6/13.87/47 | 4/15.06/48 |
|       | 56         | 33         | .13        | .51        | .69        | .13        |
| Cu/Zn | 7.62/0.66/ | 4.41/0.70/ | 2.64/0.94/ | 2.24/1.12/ | 2.17/1.04/ | 2.08/0.97/ |
| /Sn/S | 1.25/4.00  | 1.32/4.00  | 1.28/4.00  | 1.22/4.00  | 1.16/4.00  | 1.25/4.00  |

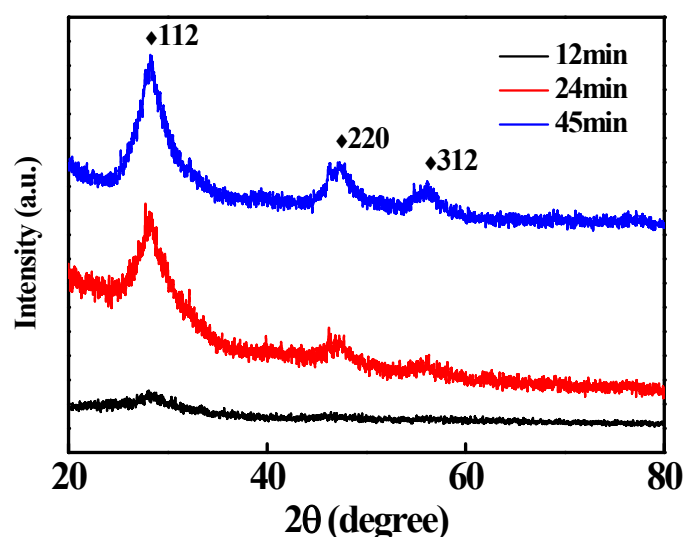

**Figure S1.** XRD patterns of CZTS QDs synthesized at different reaction times.
